# Supplementary material
Source: HighWire-hosted journal article supplement (https://jitc.bmj.com/content/13/2/e010541)
Supplement: inline-supplementary-material-4 [file inline-supplementary-material-4.pdf]

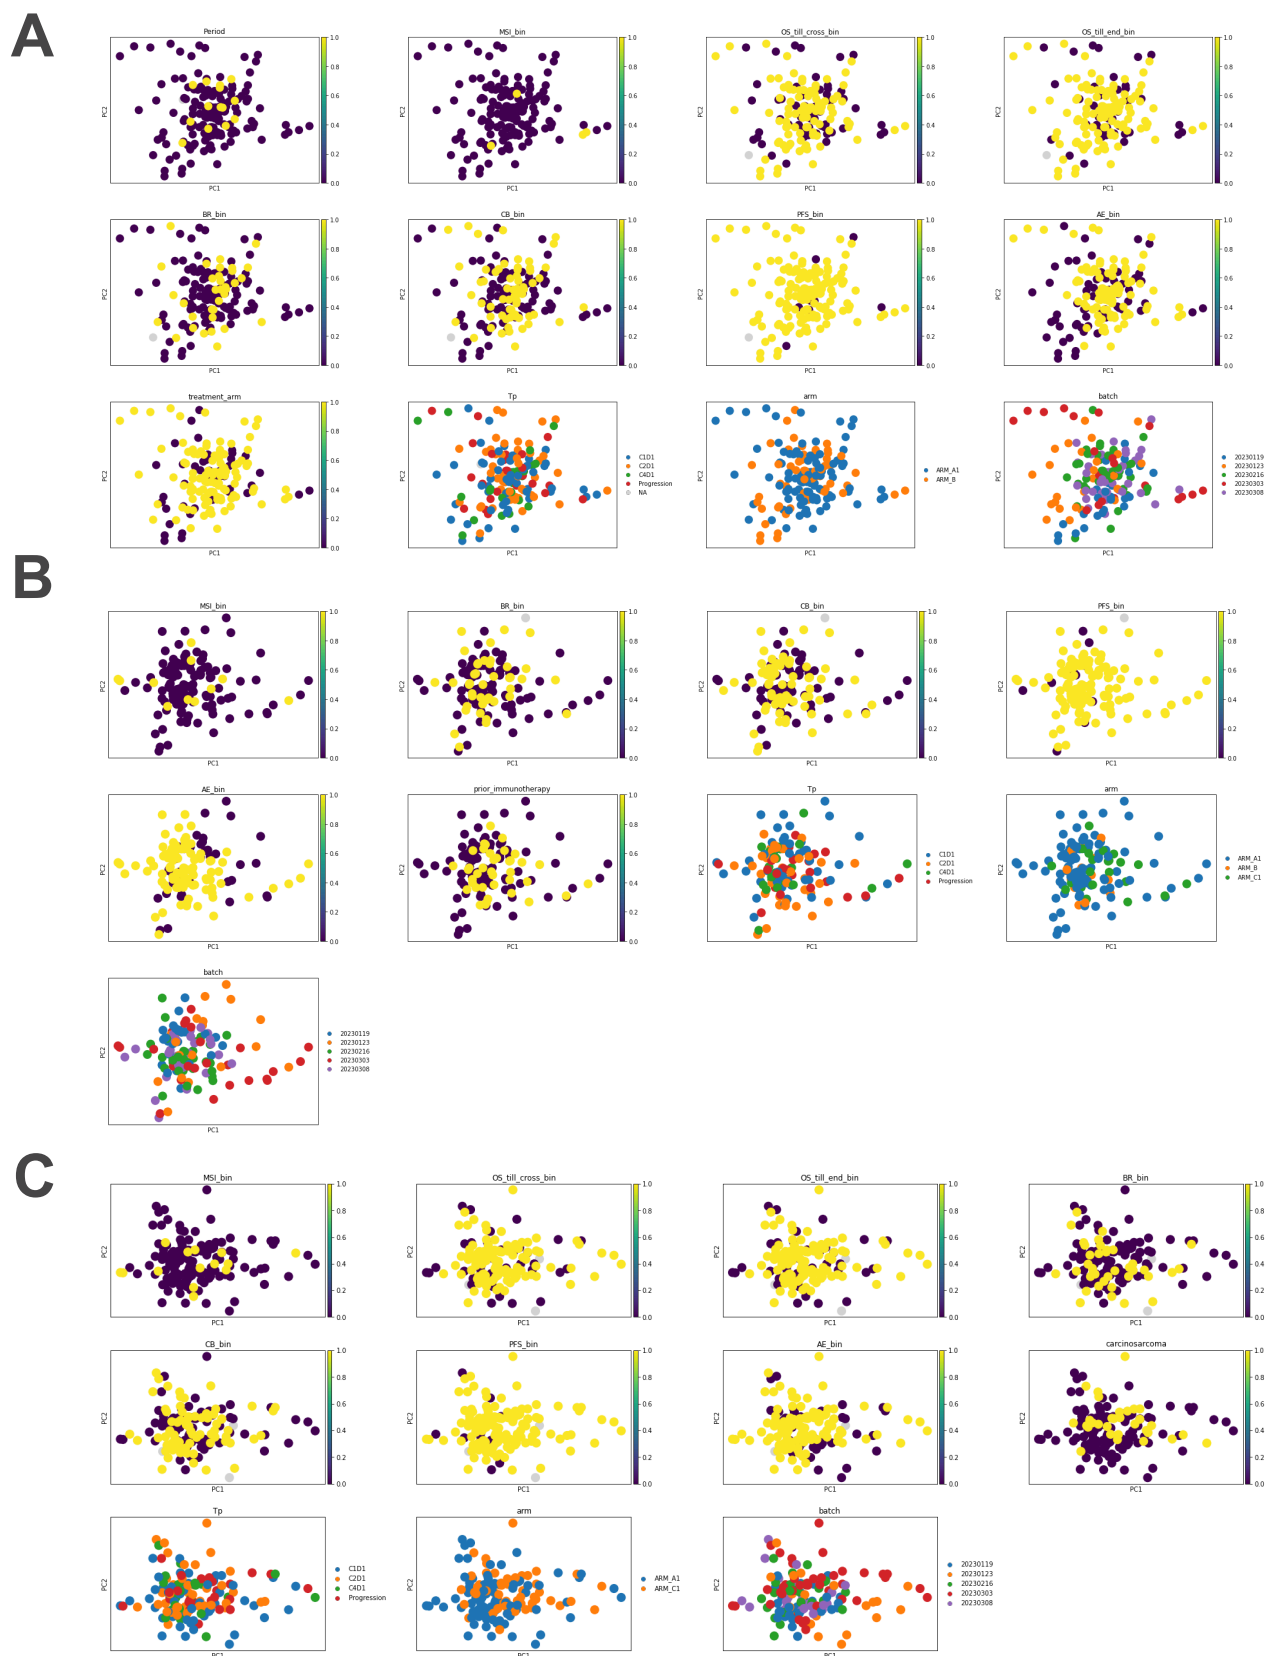

**Supplementary Figure 6.** PCA decomposition analysis of CyTOF data from randomized parts arm A and B (**A**), subjects treated with nivo+cabo with or without prior immunotherapy (**B**) and subjects treated with nivo+cabo with or without carcinosarcoma (**C**).
